# Supplementary material for: Screening the functions of modified rice straw biochar for adsorbing manganese from drinking water
Source: Royal Society of Chemistry journal article supplement (doi:10.1039/d2ra01720b), 2022-01-01
Supplement: d2ra01720b1.pdf [file d2ra01720b1.pdf]

### Supplemental materials

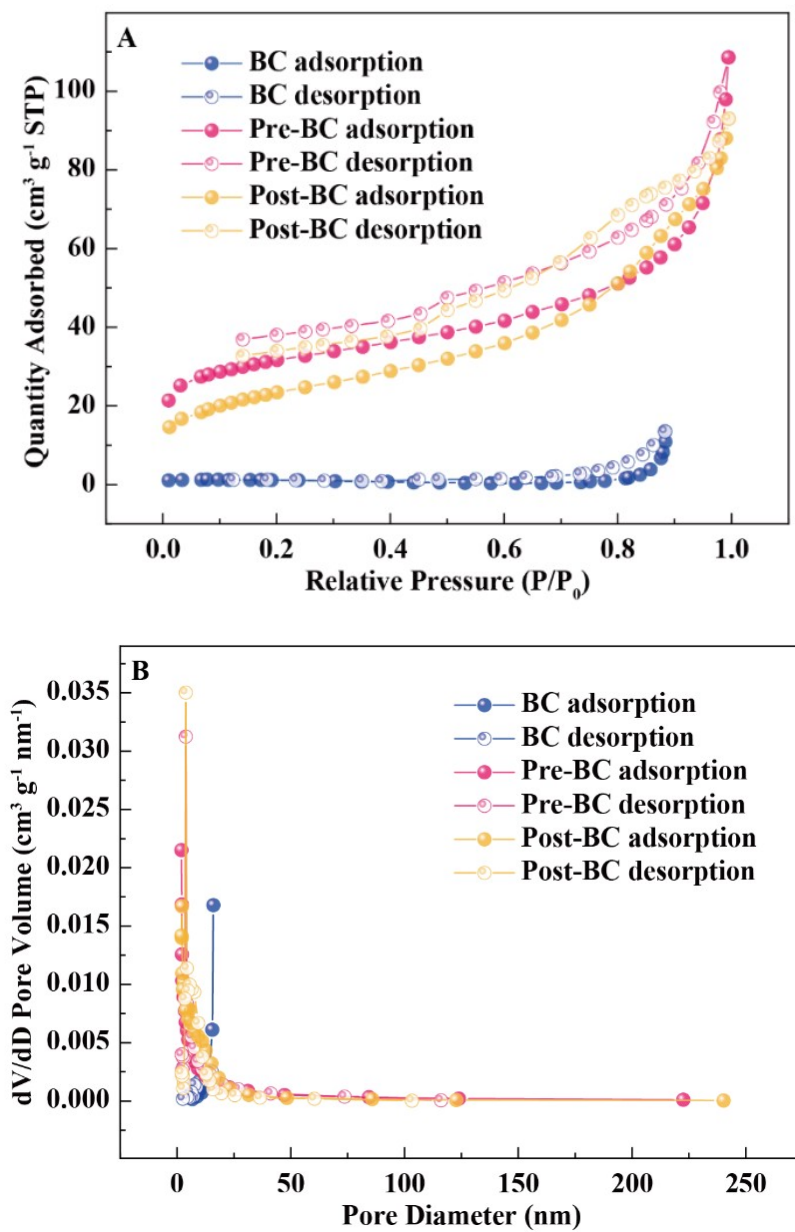

**Figure S1** BET of BC, Pre-BC, and Post-BC. A: N<sub>2</sub> adsorption/desorption isotherm. B: BJH

dV/dD adsorption/desorption pore volume.

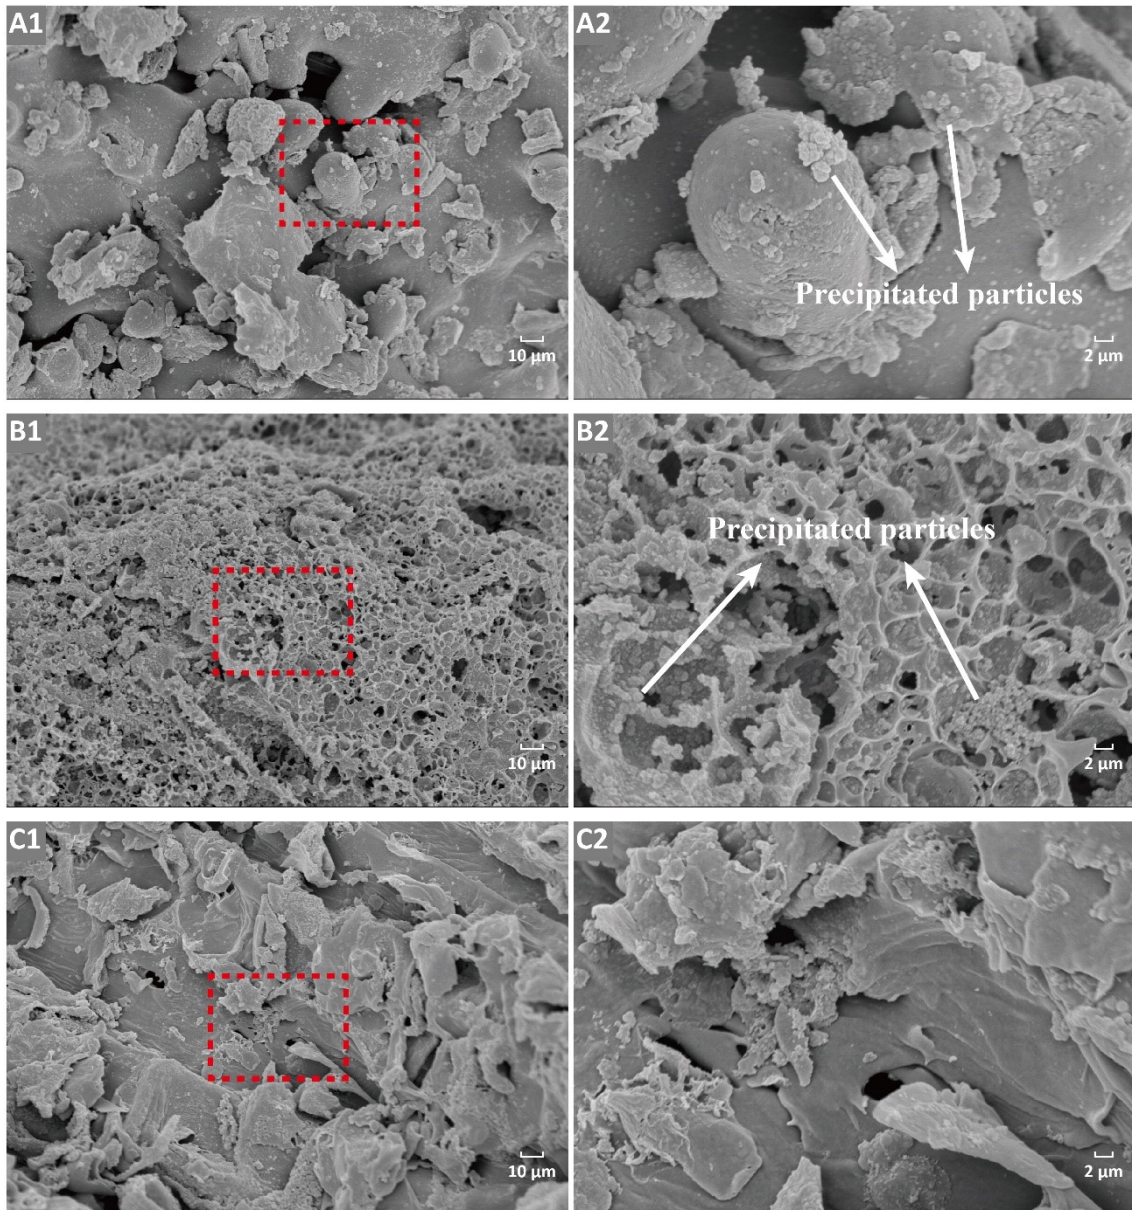

**Figure S2** SEM spectra of biochars after adsorption. \*5.0 k magnification times: A1 of BC, B1 of Pre-BC, C1 of Post-BC; \*20.0 k magnification times: A2 of BC, B2 of Pre-BC, C2 of Post-BC

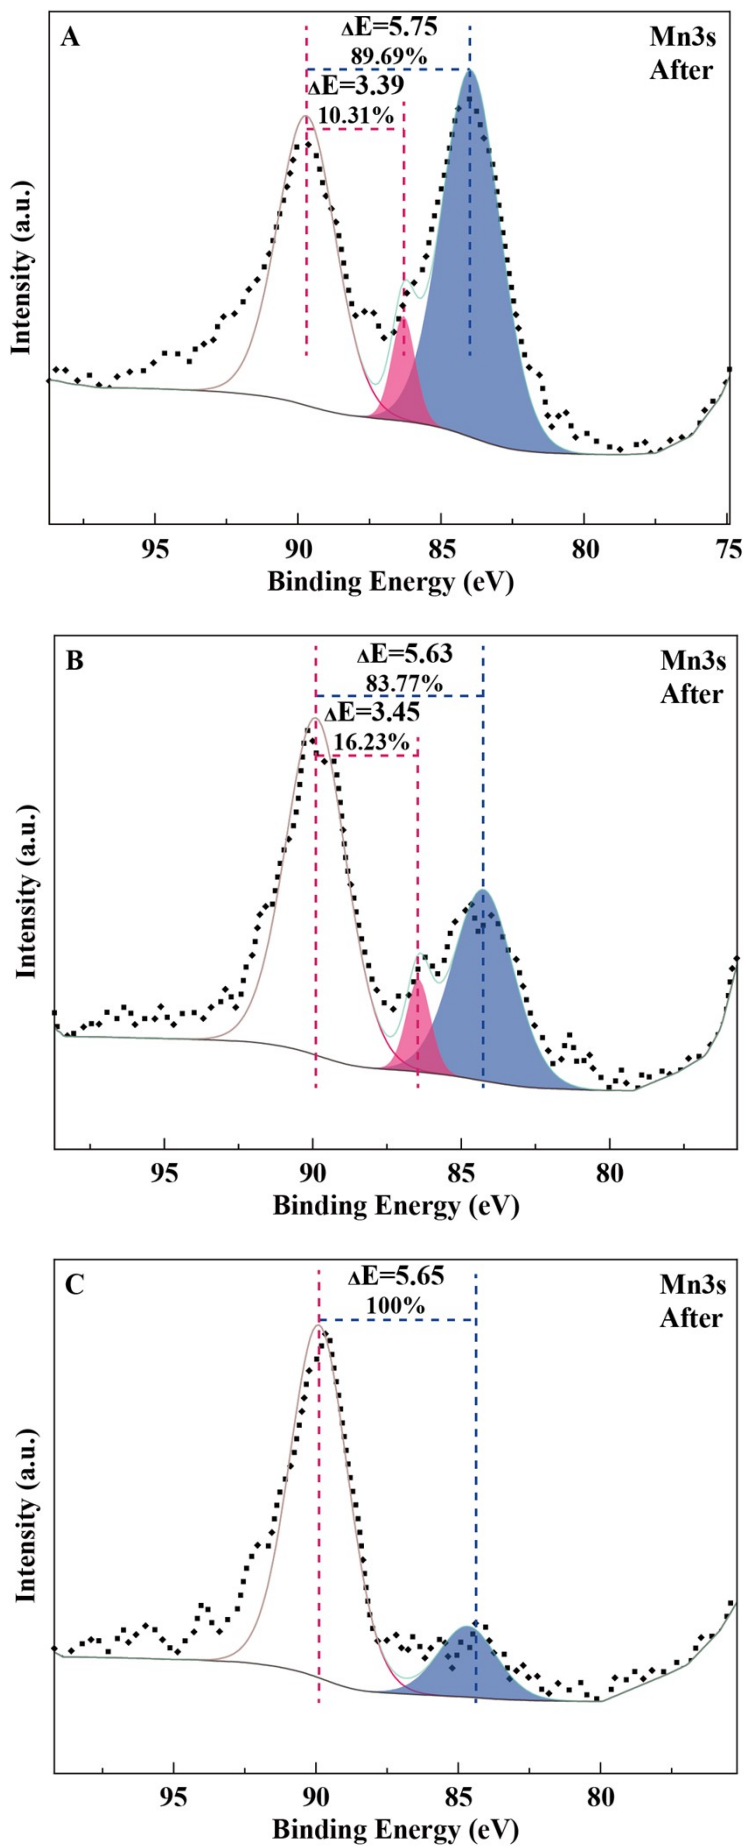

Figure S3 XPS refined scan spectra of Mn3s after adsorption. A: BC, B: Pre-BC, C: Post-BC

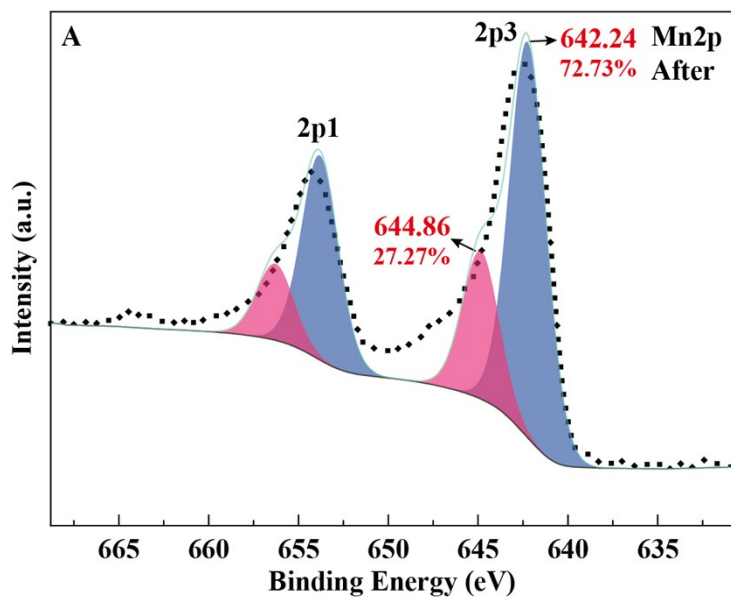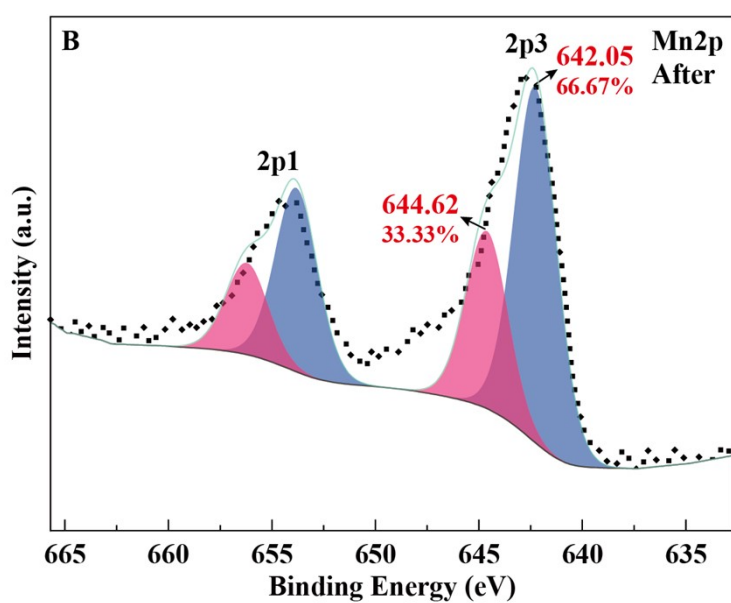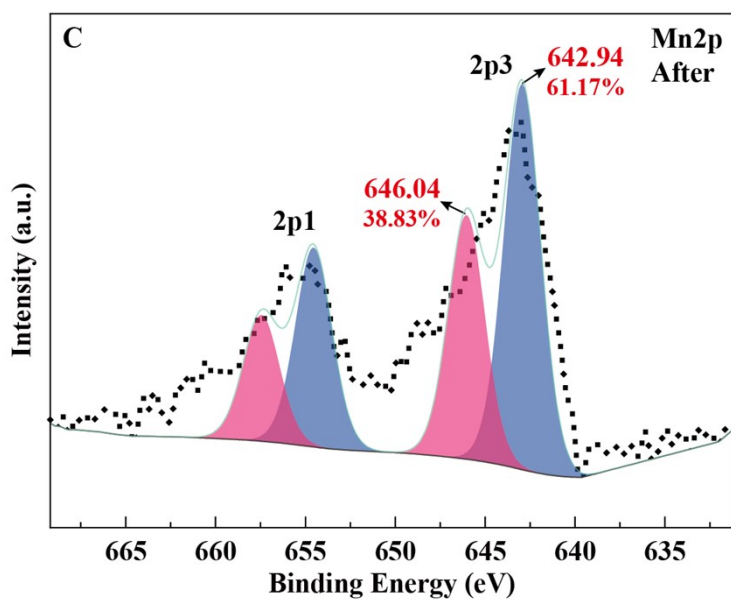

**Figure S4** XPS refined scan spectra of Mn2p after adsorption. A: BC, B: Pre-BC, C: Post-BC.

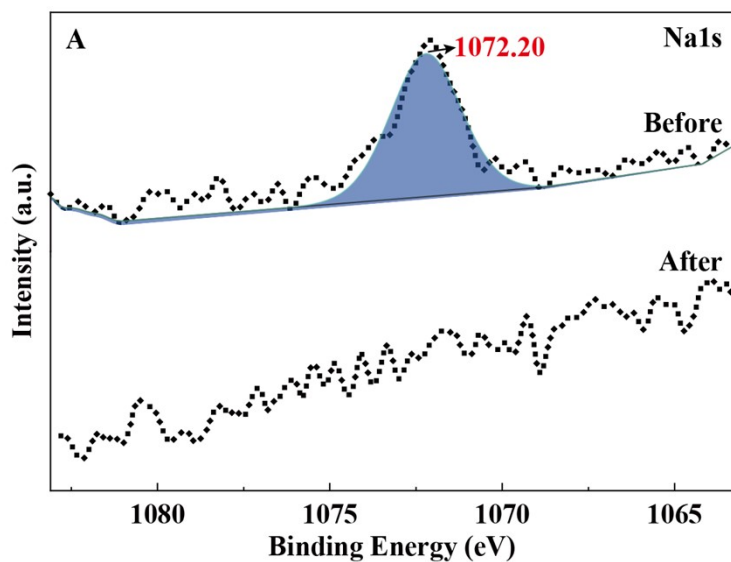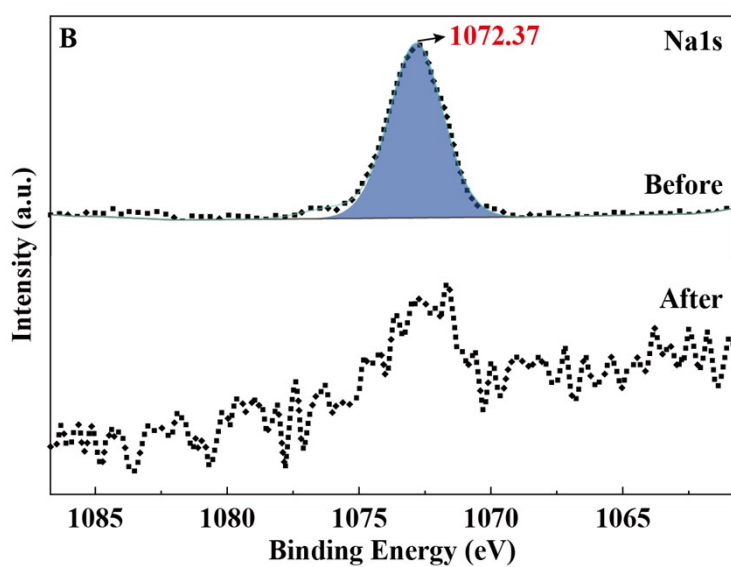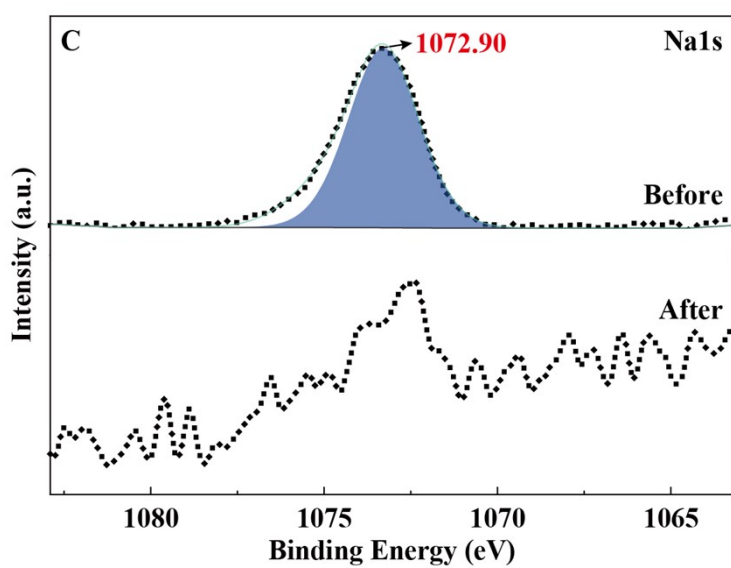

Figure S5 XPS refined scan spectra of Na1s before and after adsorption. A: BC, B: Pre-BC, C: Post-BC

**Table S1** Variation of pH before and after adsorption of demineralized biochars

|        | Demineralized BC | Demineralized Pre-BC | Demineralized Post-BC |
|--------|------------------|----------------------|-----------------------|
| Before | 6.80±0.02        | 6.80±0.02            | 6.80±0.02             |
| After  | 6.72±0.03        | 6.13±0.01            | 6.44±0.03             |
